# Supplementary material
Source: PubMed Central journal article supplement (PMC3037654)

## SUPPLEMENTARY FIGURE LEGENDS

### Fig. S1. Cell death of TopBP1-deficient embryos

Merged images were obtained from representative wild-type and *TopBP1*<sup>Δ/Δ</sup> embryos (E3.5 blastocyst) which were cultured for 24 h and subjected to DAPI and TUNEL staining. The magnification is ×40.

### Fig. S2. Ablation of TopBP1 in the nucleus

TopBP1 in the nucleus of *TopBP1*<sup>+/+</sup> and *TopBP1*<sup>flox/flox</sup> MEF cells treated as described in Figure 4 was detected by immunostaining with anti-TopBP1 antibody.

### Fig. S3. TopBP1-ablated cells containing 4N DNA content were arrested in the late G2 phase.

(A) At 120 h after Cre-retrovirus infection, *TopBP1*<sup>+/+</sup> and *TopBP1*<sup>flox/flox</sup> 3T3 cells were subjected to a double thymidine block (Thy/Thy). The cells were immunostained with anti-p-H3 antibody and counterstained with DAPI. (B) The cells in late G2 phase or mitosis were counted and described.

### Fig. S4. Activation of DNA damage signaling in TopBP1-ablated cells.

The cells were treated as described in Figure 5A and B.

### Fig.S5. TopBP1-ablated cells contain abnormal nuclei.

The cells were treated as described in Figure 5D.

### Fig. S6. TopBP1 knockdown induced DNA damage signaling and reduction of DNA replication.

The cells were treated as described in Figure 7B.

Table S1. PCR primers used in genotyping

| PCR reaction | Sequence                                                                               | PCR product |
|--------------|----------------------------------------------------------------------------------------|-------------|
| ①-a          | 5'-TTG AGA AGA TAG TTT GGG TCA CAG-3'<br>5'-CTC TAC CCA TAC CAC CCA CC-3'              | 255 bp      |
| ①-b          | 5'-CAC CTT GTG TTC TGA TGT GTC-3'<br>5'-GTC AGG TAG TGA AAC ATC ATG GGC-3'             | 154 bp      |
| ②            | 5'-TTG AGA AGA TAG TTT GGG TCA CAG-3'<br>5'-GTT GGC GCC TAC CGG TGG ATG TGG AAT GTG-3' | 434 bp      |

|     |                                                                             |        |
|-----|-----------------------------------------------------------------------------|--------|
| ③   | 5'-CAC CTT GTG TTC TGA TGT GTC-3'<br>5'-GTC AGG TAG TGA AAC ATC ATG GGC-3'  | 234 bp |
| ④-a | 5'-CCT GGG GAA AGT GGA ATA TG-3'<br>5'-GTC AGG TAG TGA AAC ATC ATG GGC-3'   | 383 bp |
| ④-b | 5'-CCT GGG GAA AGT GGA ATA TG-3'<br>5'-CAA TAA CAA GGA CAG TTC CTT AAT T-3' | 290 bp |

Table S2. Genotypes of progeny from TopBP1-heterozygous intercrosses

| Age (dpc <sup>a</sup> )              | No. (%) of mice<br>with indicated genotype |             |                 | Number (%)                           |       |
|--------------------------------------|--------------------------------------------|-------------|-----------------|--------------------------------------|-------|
|                                      | +/+                                        | +/ $\Delta$ | $\Delta/\Delta$ | No. (%)<br>of<br>resorbed<br>embryos | Total |
|                                      |                                            |             |                 |                                      |       |
| E3.5                                 | 44 (21.4)                                  | 90 (43.7)   | 72 (34.9)       |                                      | 206   |
| E8.5                                 | 16 (24.2)                                  | 40 (60.6)   | 0               | 10 (15.2)                            | 66    |
| E10.5                                | 4 (15.4)                                   | 16 (61.5)   | 0               | 6 (23.1)                             | 26    |
| E13.5                                | 4 (25.0)                                   | 12 (75.0)   | 0               |                                      | 16    |
| Neonates                             | 63 (37.5)                                  | 105 (62.5)  | 0               |                                      | 168   |
| Blastocyst<br>outgrowth <sup>b</sup> | 12 (27.3)                                  | 24 (54.5)   | 8 (18.2)        |                                      | 44    |

<sup>a</sup>, days postcoitum

<sup>b</sup>, genotyping after blastocyst outgrowth

Figure S1

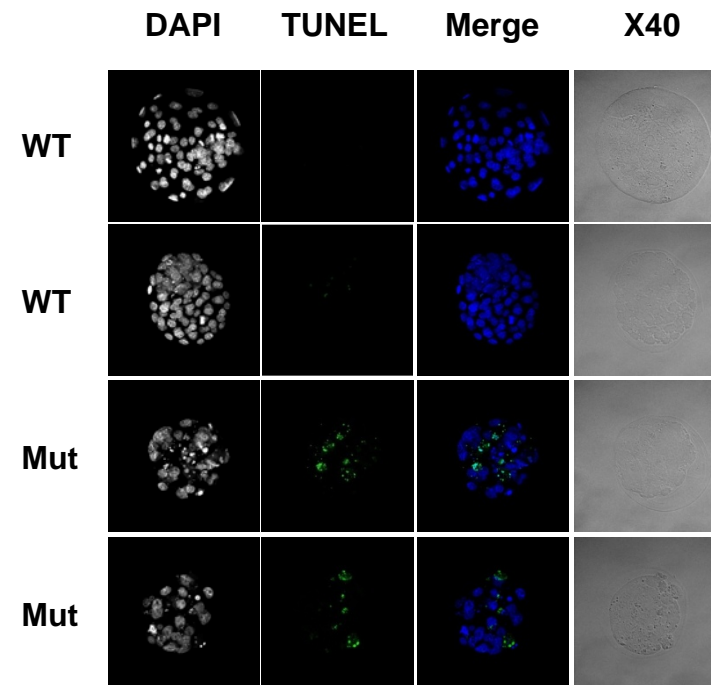

Figure S2

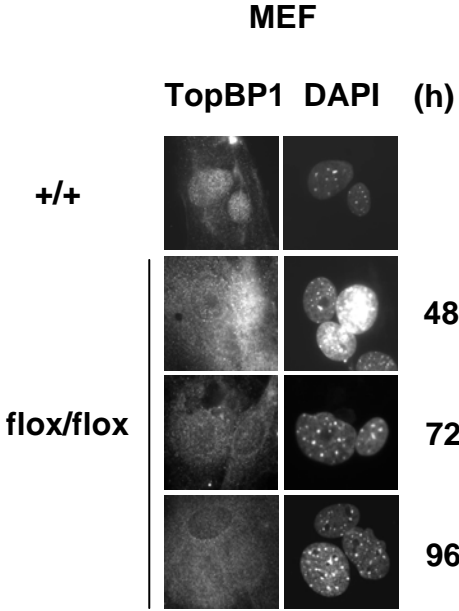

Figure S3

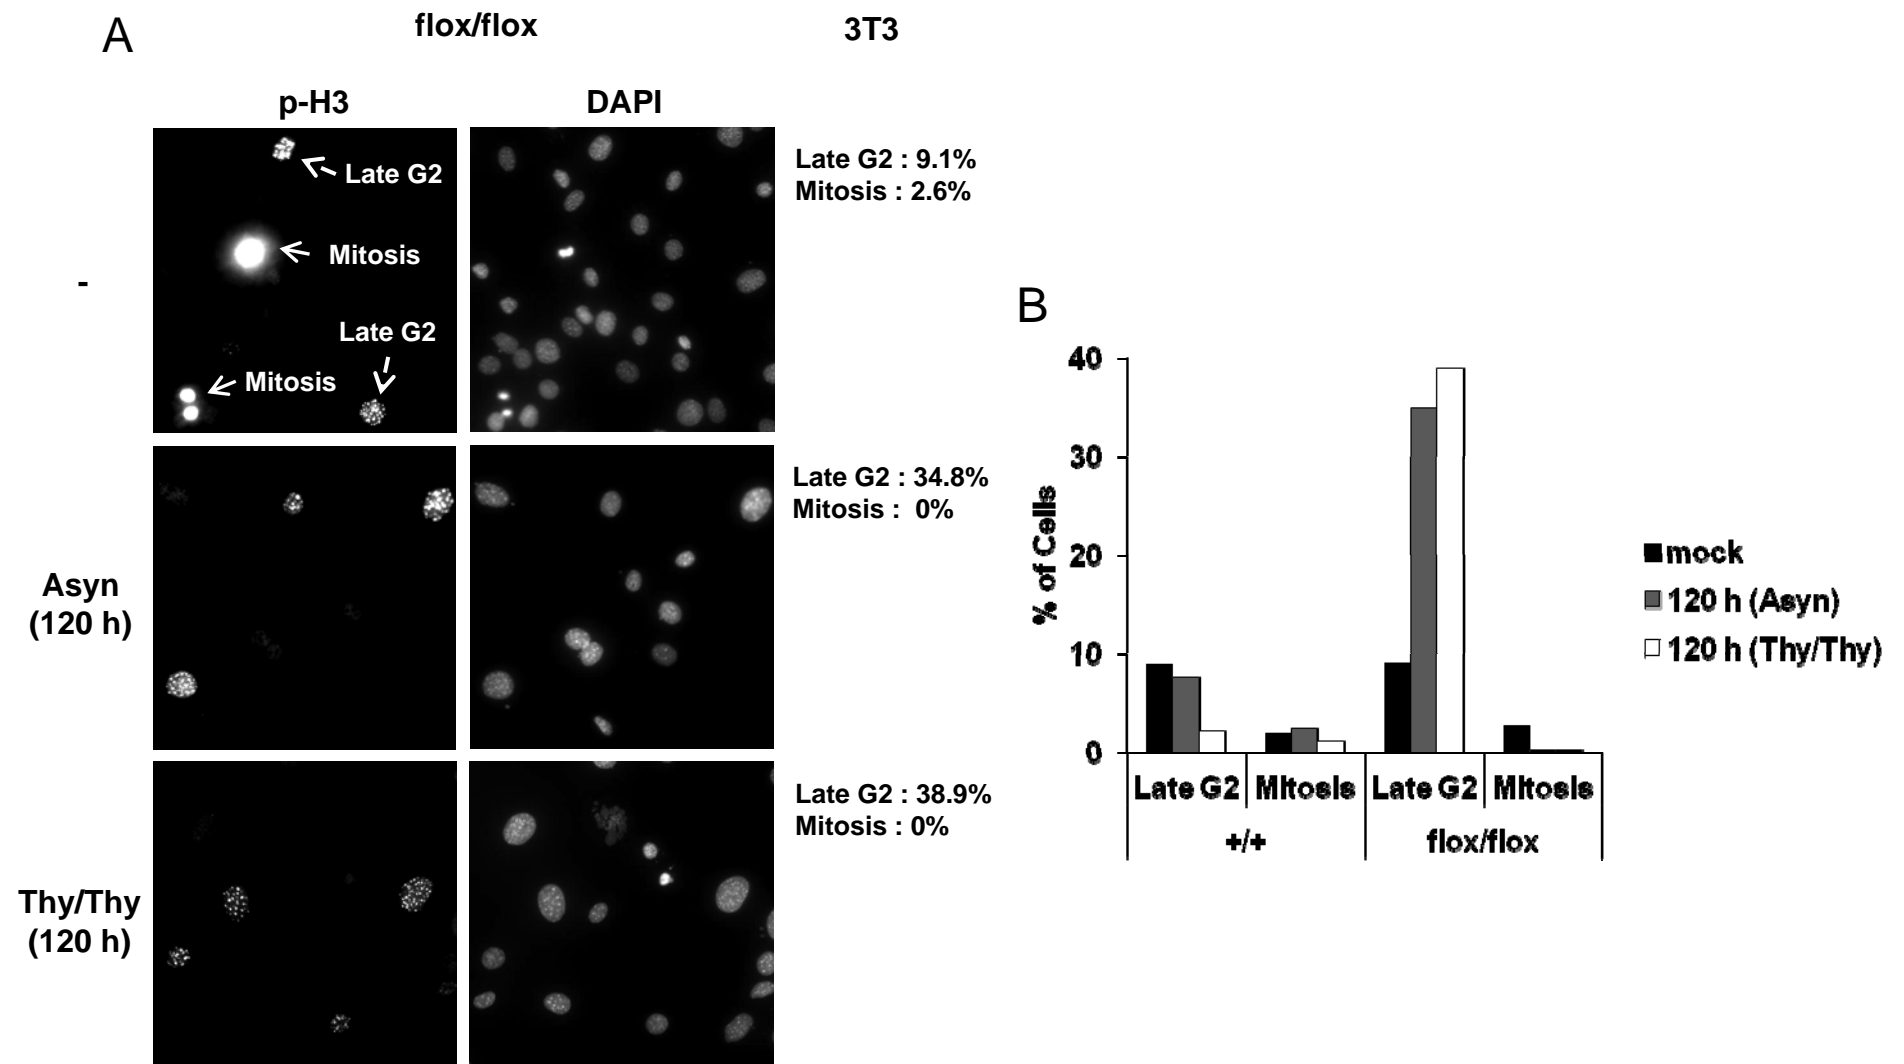

Figure S4

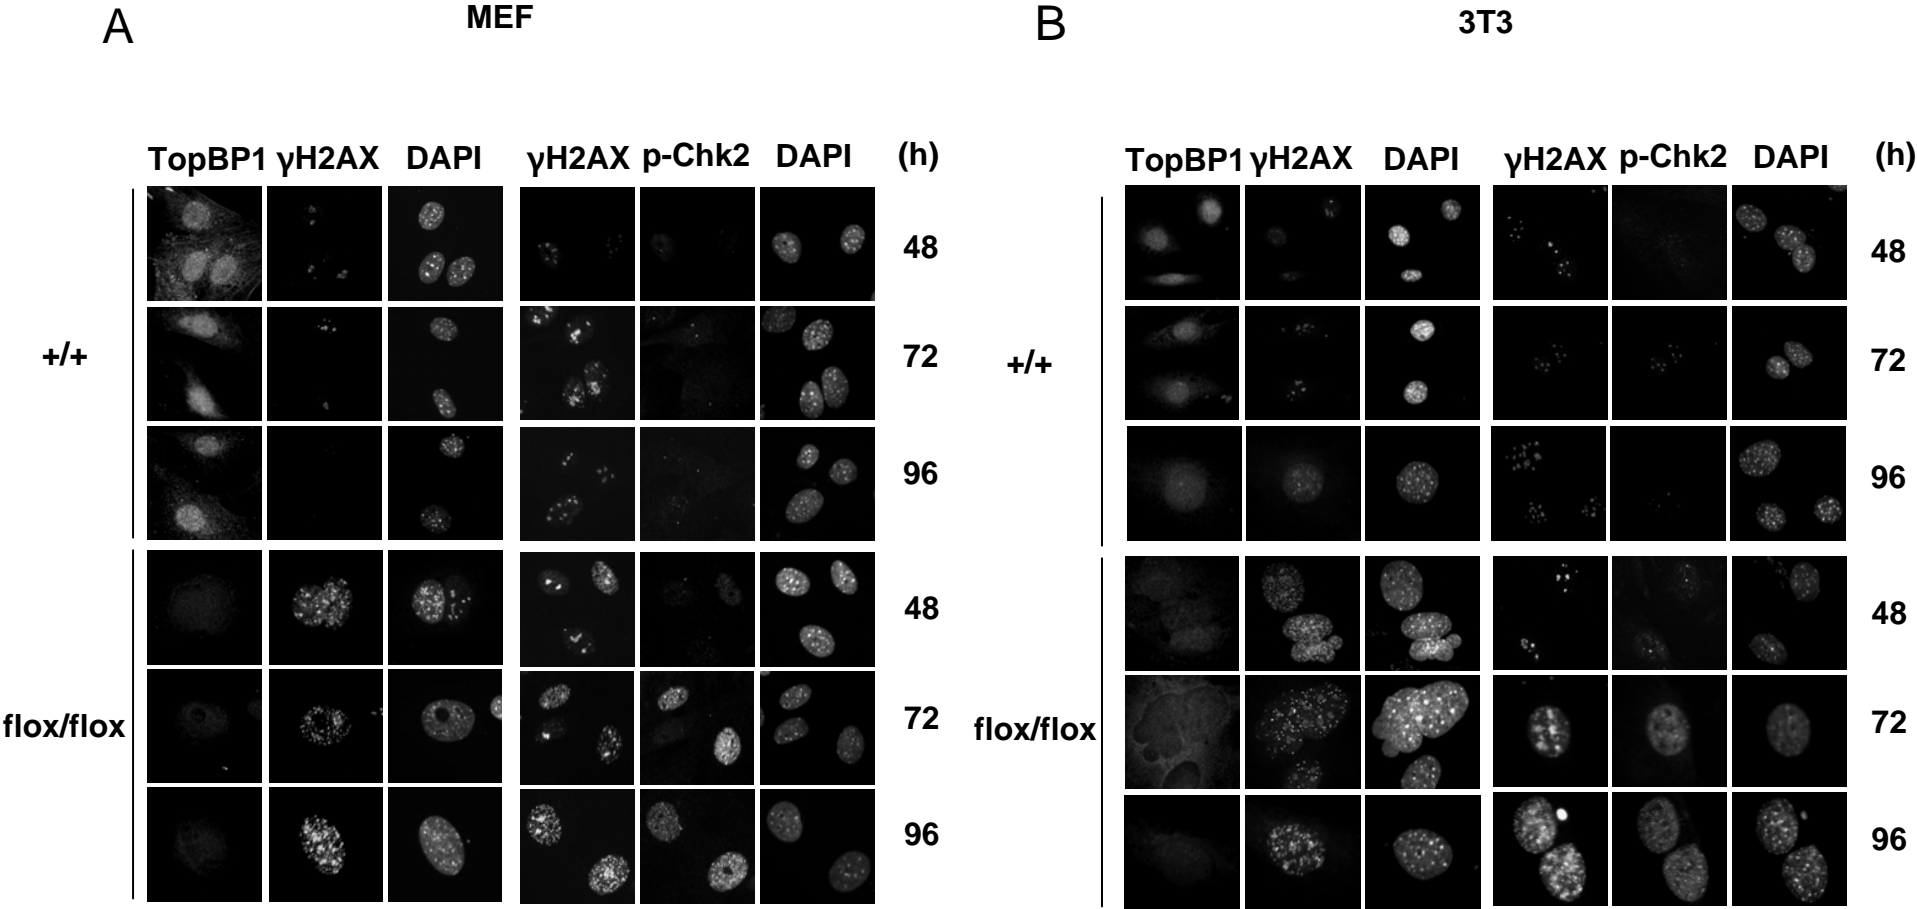

Figure S5

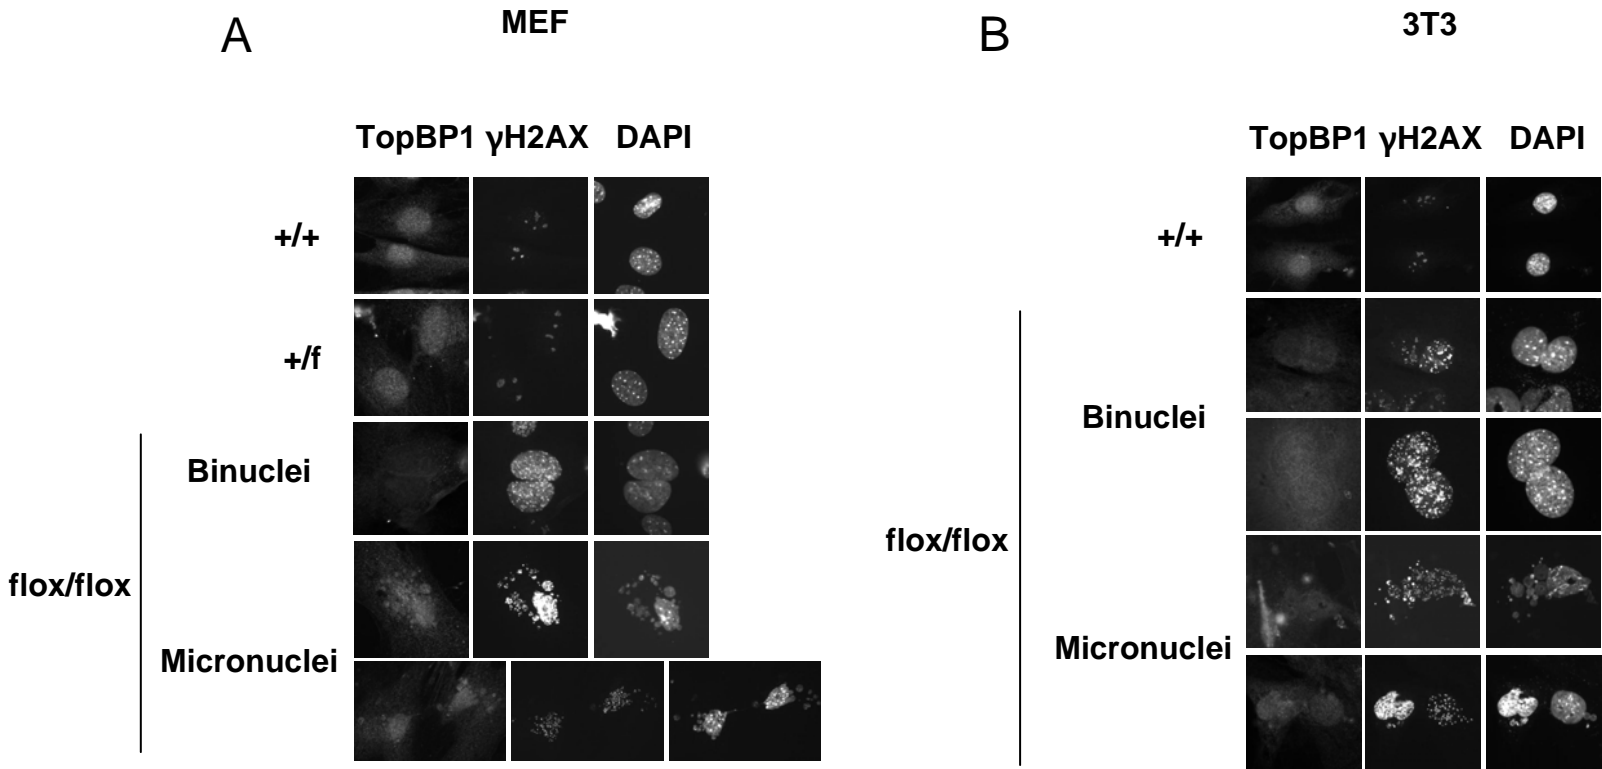

Figure S6

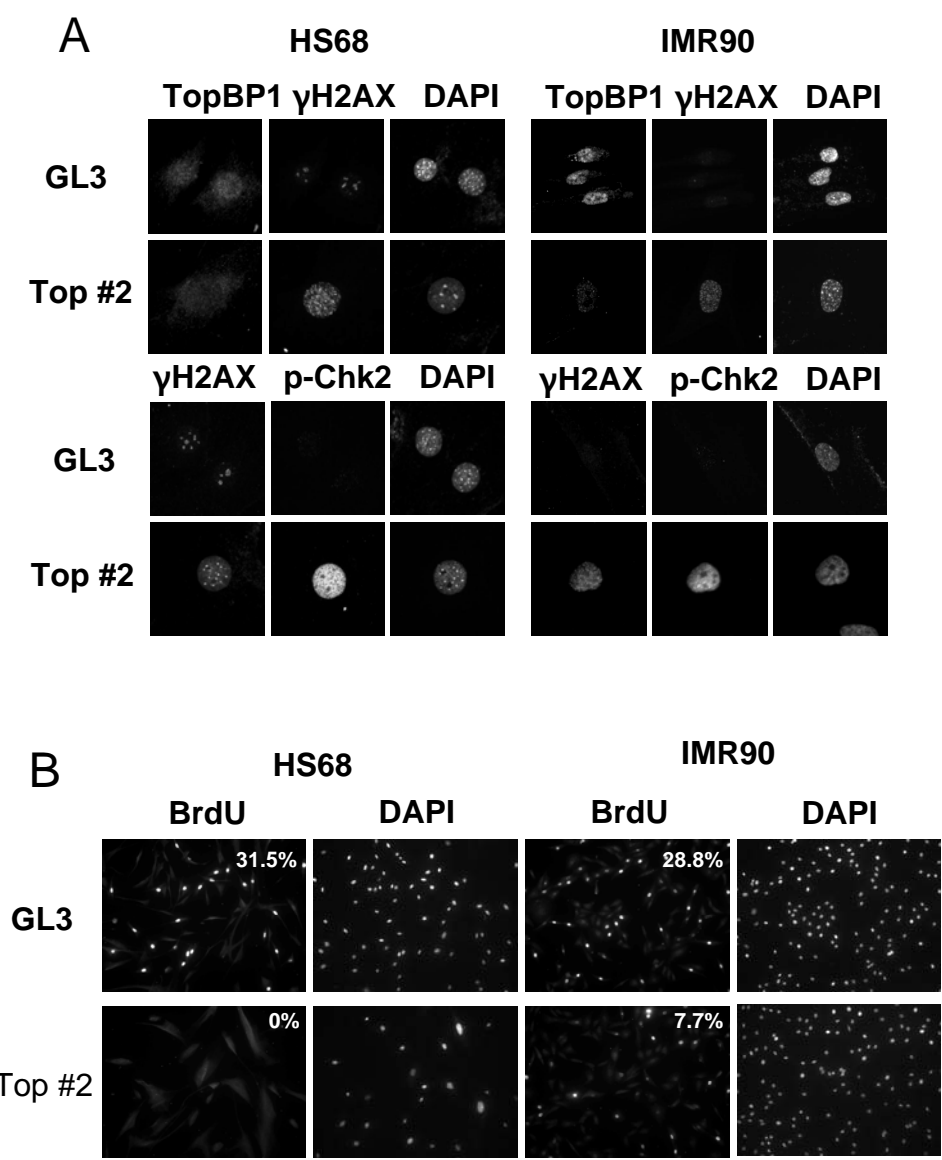

Supplement: supp_M110.189704_TbpKo-SupplMaterial-_11-0112.pdf [file supp_M110.189704_TbpKo-SupplMaterial-_11-0112.pdf]
